# Supplementary material for: PYL Family Genes from Liriodendron chinense Positively Respond to Multiple Stresses
Source: MDPI journal article supplement (doi:10.3390/plants12142609), 2023-07-11
Supplement: s1 [file s1]

---

## Supplementary information

### Supplementary Tables:

Supplementary Table S1. Specific primers of genes for quantitative real-time PCR (qPCR) analysis

| Accession number | Primer name      | Sequence (5'-3')           |
|------------------|------------------|----------------------------|
| Lchi00864        | Lchi00864-qPCR F | CGAGCATCCTGAAAGGTATAAGCA   |
|                  | Lchi00864-qPCR R | GTCACGTCTCTTATACTCCCTACACC |
| Lchi01385        | Lchi01385-qPCR F | TGGATAAAATGCCCCATATAACCC   |
|                  | Lchi01385-qPCR R | CGTGTTGAAATGACCAGAATACCC   |
| Lchi11622        | Lchi11622-qPCR F | TGGCAAACCTACCAATCCACGAC    |
|                  | Lchi11622-qPCR R | TGTGAAGATGACCGTATCCTCC     |
| Lchi13641        | Lchi13641-qPCR F | AAACAAATCCTCTGATCAACTCCG   |
|                  | Lchi13641-qPCR R | TGTCCGTTTCATTGCCAAATCACC   |
| Lchi16997        | Lchi16997-qPCR F | TTCGATCAGCCACAGAAATATAAGCC |
|                  | Lchi16997-qPCR R | GACTTCACATTACCTCCCGAAC     |
| 18S RNA          | 18S RNA-qPCR F   | ATTTCTGCCCTATCAACTTTCG     |
|                  | 18S RNA-qPCR R   | TTGTTATTTATTGTCACTACCTCCC  |

Supplementary Table S2. Specific primers designed for gene clone

| Accession number | Primer name       | Sequence (5'-3')         |
|------------------|-------------------|--------------------------|
| Lchi01385        | Lchi01385-clone F | ATGGAAGAAGGAGAGAAATCAACG |
|                  | Lchi01385-clone R | CTCTCCCTTTTGATCCTCCTTC   |
| Lchi11622        | Lchi11622-clone F | ATGGTGTTCTACCAACAAACCT   |
|                  | Lchi11622-clone R | TCAATAGCTGAGAGAATCTGACTC |
| Lchi16997        | Lchi16997-clone F | ATGGTAGGAGAAGAGAGGTGGTG  |
|                  | Lchi16997-clone R | TCAGTATCGGTTCGATGGGCTC   |
